# Supplementary material
Source: PubMed Central journal article supplement (PMC5936644)

# Supplemental Figure 1: Schematic Drawing of "Shoe Mold"

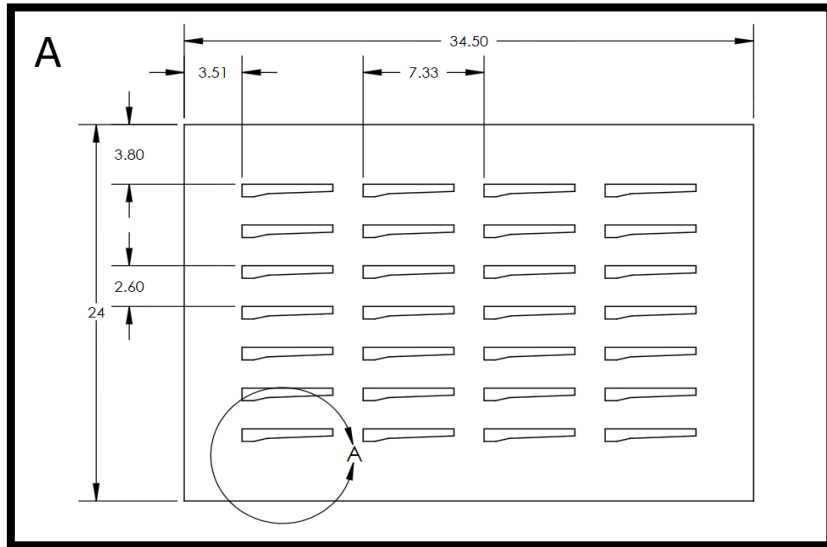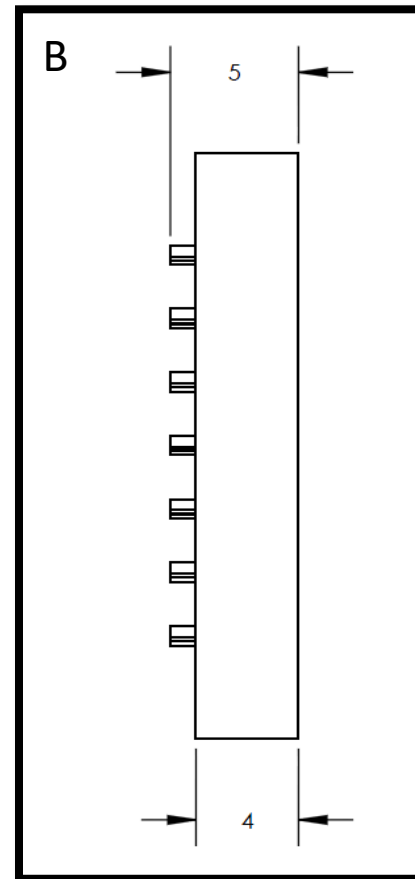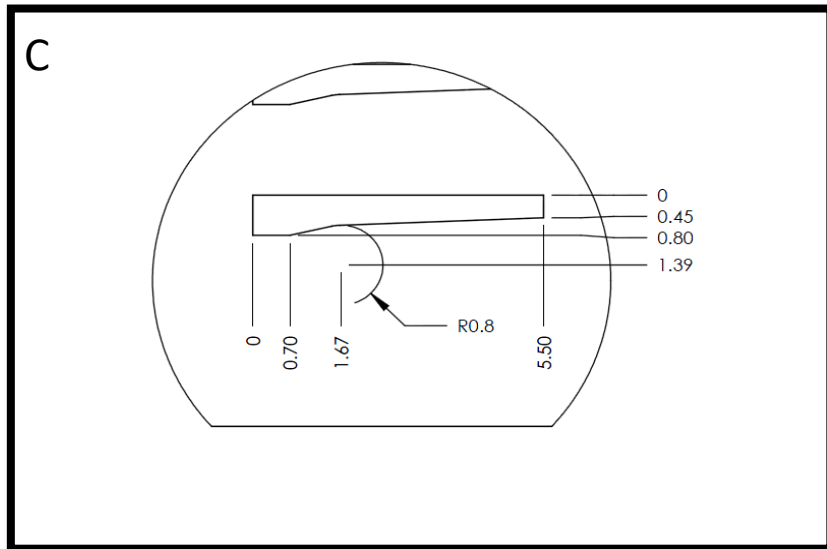

Supplement: NIHMS955075-supplement-Supplemental_Figure_1__Schematic_Drawing_of__Shoe_Mold_.pdf [file NIHMS955075-supplement-Supplemental_Figure_1__Schematic_Drawing_of__Shoe_Mold_.pdf]
